# Supplementary material for: Fabrication of Co(OH)F catalyst for efficient peroxymonosulfate activation in sulfamethazine degradation
Source: Royal Society of Chemistry journal article supplement (doi:10.1039/d5nj03703d), 2025-01-01
Supplement: d5nj03703d1.pdf [file d5nj03703d1.pdf]

## **Fabrication of Co(OH)F Catalyst for Efficient Peroxymonosulfate Activation in Sulfamethazine Degradation**

Chengli Zhang <sup>a</sup>, Yonglei Xing <sup>a,\*</sup>, Xiaoyong Jin <sup>a,\*</sup>, Yage Peng <sup>a</sup>, Gang Ni <sup>b,\*</sup>

<sup>a</sup> State Key Laboratory of High-efficiency Utilization of Coal and Green Chemical Engineering, National Demonstration Center for Experimental Chemistry Education, School of Chemistry and Chemical Engineering, Ningxia University, Yinchuan, 750021, PR China.

<sup>b</sup> Ningxia Key Laboratory of Green Catalytic Materials and Technology, College of Chemistry and Chemical Engineering, Ningxia Normal University, Guyuan 756000, PR China

---

\* Corresponding author:

Tel.: +86-0951-2062851 (O), Fax: +86-0951-2062851, Email address: ylxing@nxu.edu.cn; jinxy588@163.com; nigang@nxu.edu.cn.

## 1. Characterization

The crystal structure of the sample was characterized by X-ray diffraction (XRD) using a Bruker D8 Advance diffractometer with Cu K $\alpha$  radiation ( $\lambda = 1.5406 \text{ \AA}$ ) operated at 40 kV and 40 mA. Data were collected from the solid powder sample in the  $2\theta$  range of  $10^\circ$ – $80^\circ$  with a step size of  $0.01^\circ$ . Phase identification and analysis were performed using the MDI Jade software package. Sample morphology was examined using a ZEISS Sigma 300 field-emission scanning electron microscope (SEM). Prior to imaging, the samples were sputter-coated with a thin layer of gold and observed under a 5 kV accelerating voltage in secondary electron (SE2) mode. Transmission electron microscopy (TEM) analysis was performed on a JEOL JEM-F200 field-emission microscope at an accelerating voltage of 200 kV. The sample was prepared by ultrasonic dispersion in ethanol, followed by depositing the suspension onto an ultra-thin carbon-coated copper grid and drying. Bright-field images, high-resolution transmission electron microscopy (HRTEM) images, and energy-dispersive X-ray spectroscopy (EDS) mapping were acquired for qualitative elemental analysis and elemental distribution assessment. The elemental composition and chemical states of the sample surface were analyzed using X-ray photoelectron spectroscopy (XPS) with a Thermo Fisher Scientific Nexsa spectrometer. High-resolution spectra were acquired with a pass energy of 50.0 eV and an energy step size of 0.100 eV. The binding energy scale was calibrated by referencing the adventitious carbon C 1s peak to 284.8 eV. Data analysis was performed using Thermo Avantage software, employing a Shirley-type background subtraction and peak deconvolution with a Gaussian-Lorentzian (30% Lorentzian) function. The surface functional groups of the sample were examined by Fourier-transform infrared spectroscopy (FT-IR) using a Bruker INVENIO spectrometer equipped with a diamond attenuated total reflectance (ATR) accessory. Measurements were performed directly on the solid sample without further preparation. Spectra were collected and processed using the Bruker OPUS software.

Textural parameters, including specific surface area, pore-size distribution, and nitrogen adsorption–desorption isotherms, were obtained using a surface area and porosity analyzer (Micromeritics ASAP 2460) based on the Brunauer–Emmett–Teller (BET) method. Surface charge characteristics were measured using a Zeta potential analyzer (POWEREACH JS94H2). Sulfamethazine (SMZ) concentrations were quantified by high-performance liquid chromatography (HPLC, HITACHI, Japan), and degradation intermediates were determined by ultra-high-performance liquid chromatography coupled with an Orbitrap high-resolution mass spectrometer (LC–MS, Thermo Fisher LTQ Orbitrap XL, USA). Reactive species capture tests were performed using electron paramagnetic resonance spectroscopy (EPR, JES-X310, JEOL, Japan). Thermal stability was assessed via thermogravimetric analysis (TGA) on a Discovery TGA 55 instrument (TA Instruments, USA). Chemical oxygen demand (COD) was measured with a multiparameter water quality analyzer (Lianhua Technology, China).

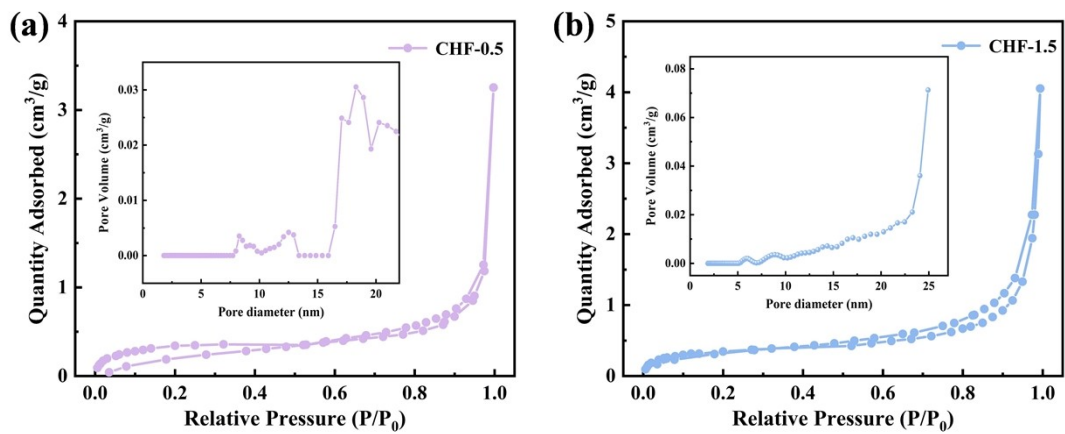

**Fig. S1.** Nitrogen adsorption–desorption isotherms and corresponding pore size distributions (insets) of (a) CHF-0.5 and (b) CHF-1.5.

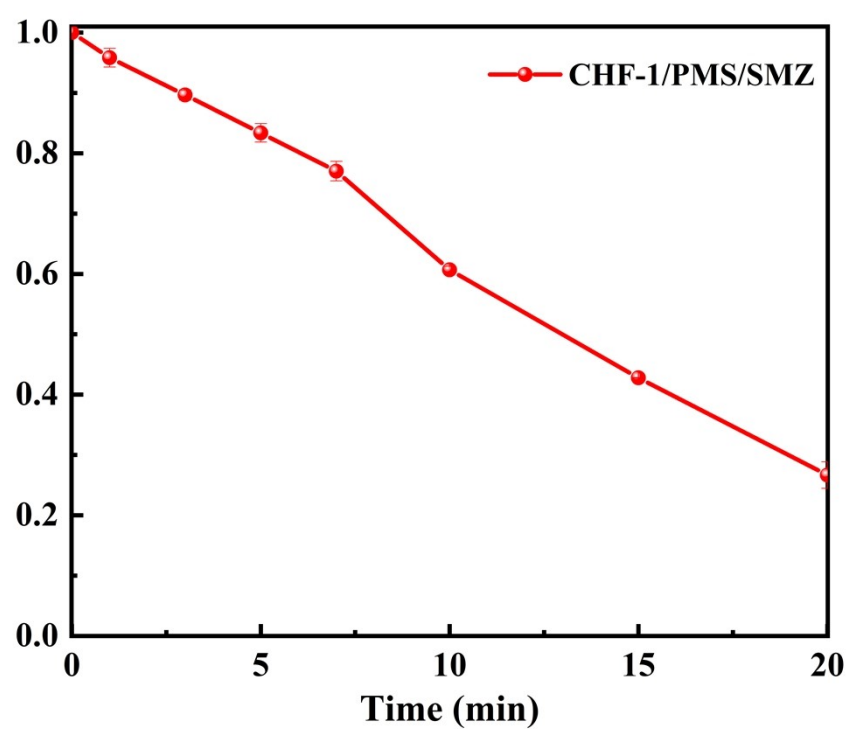

Fig. S2. Residual PMS concentrations in the CHF-1/PMS/SMZ reaction system.

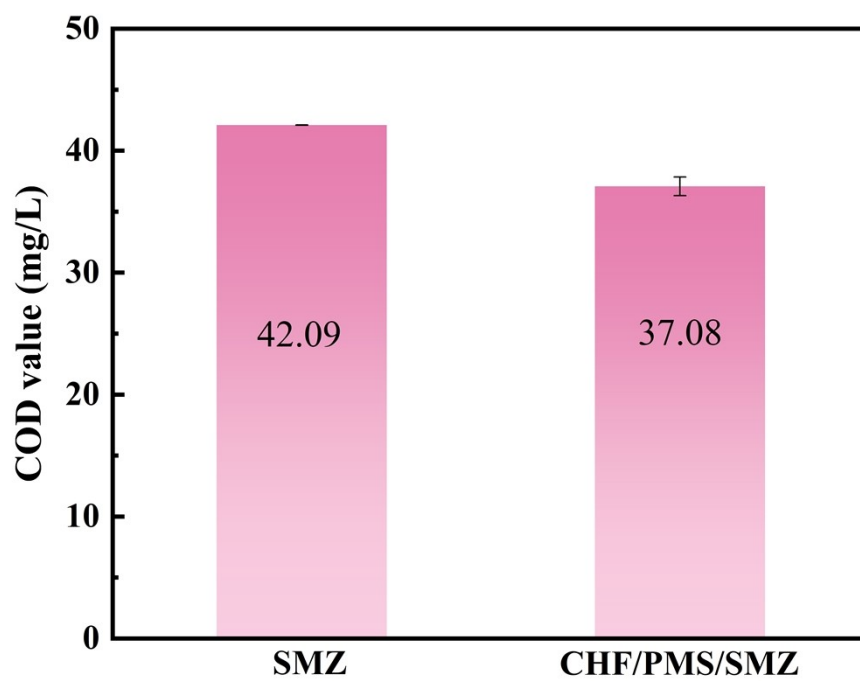

Fig. S3. COD values of different reaction systems.

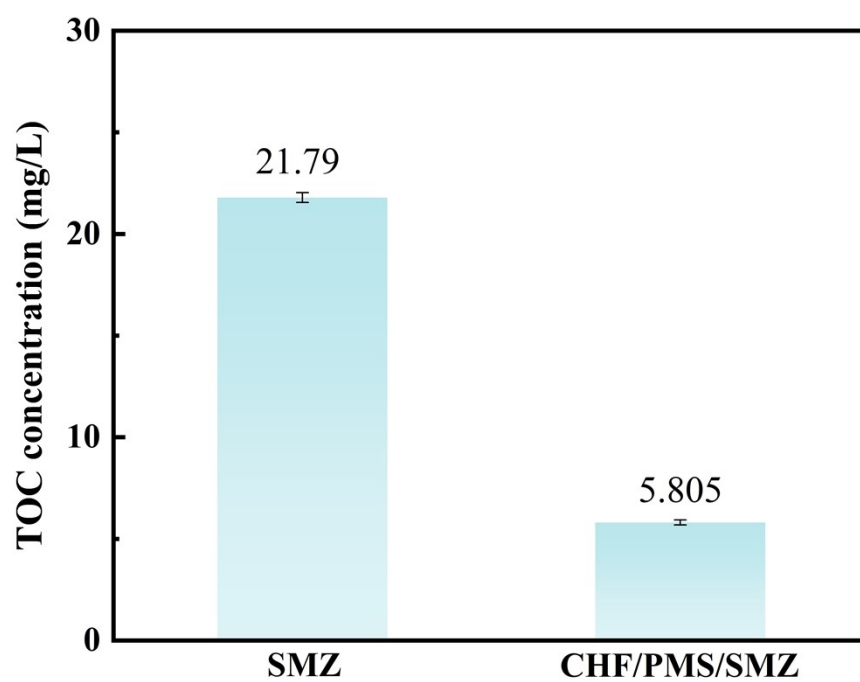

Fig. S4. TOC concentrations of different reaction systems.

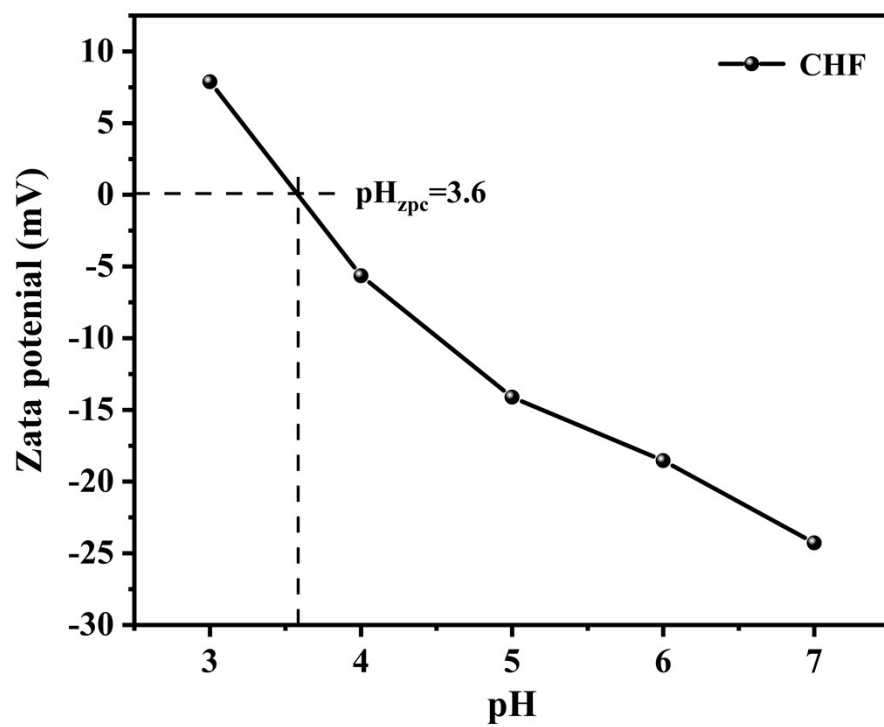

Fig. S5. Zeta potential of the catalyst at various pH values.

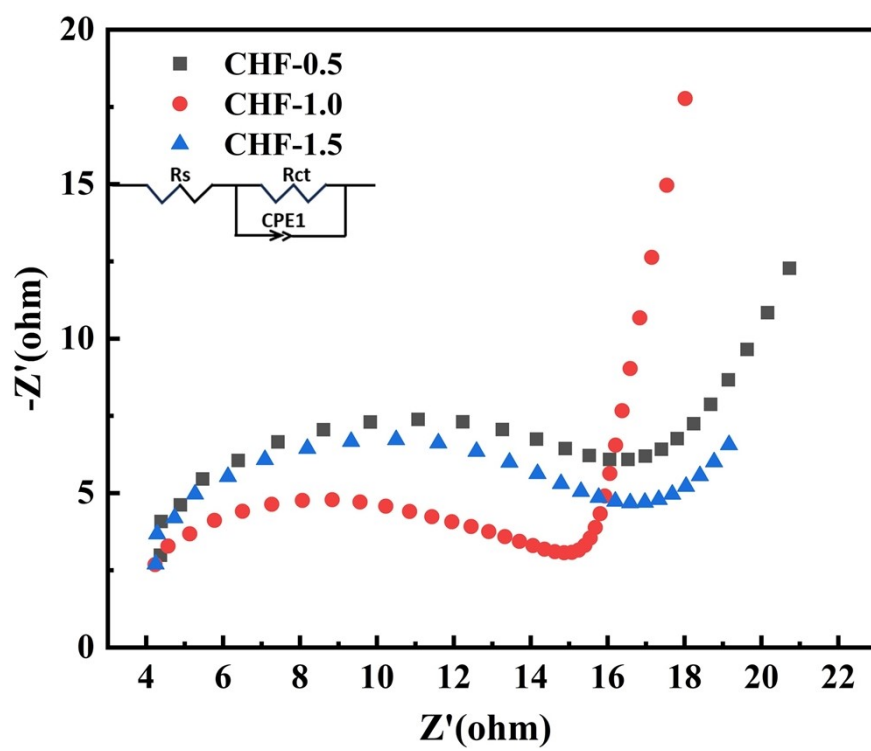

Fig. S6. EIS spectra of different catalysts.



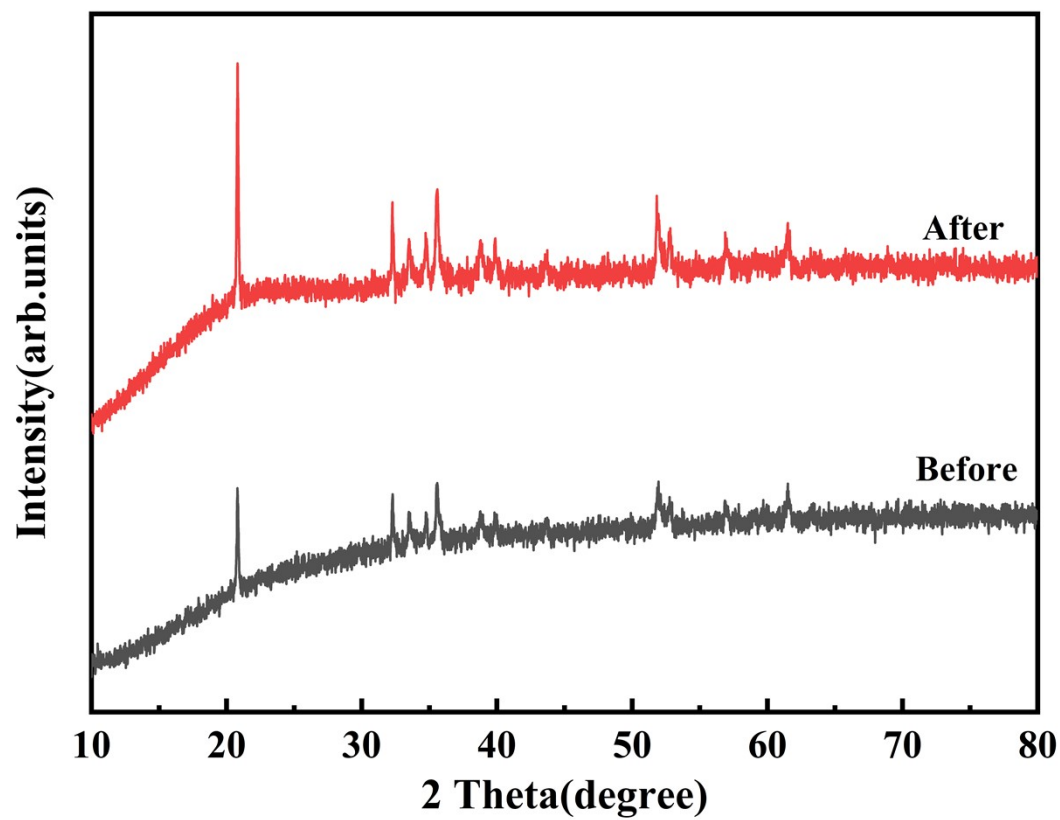

Fig. S7. XRD patterns of CoOHF-1 before and after the reaction.

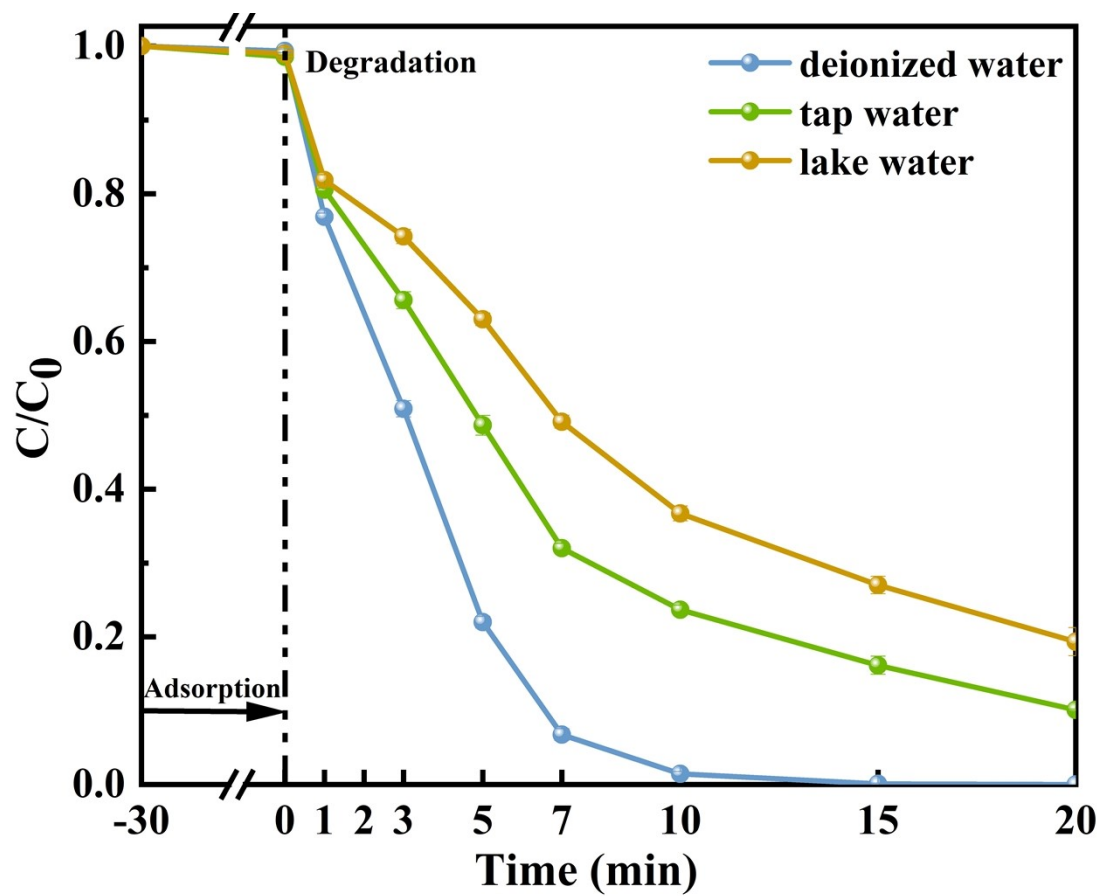

Fig. S8. Effect of different water matrices on SMZ degradation efficiency.

T: FTMS + p ESI Full ms [50.00-400.00]

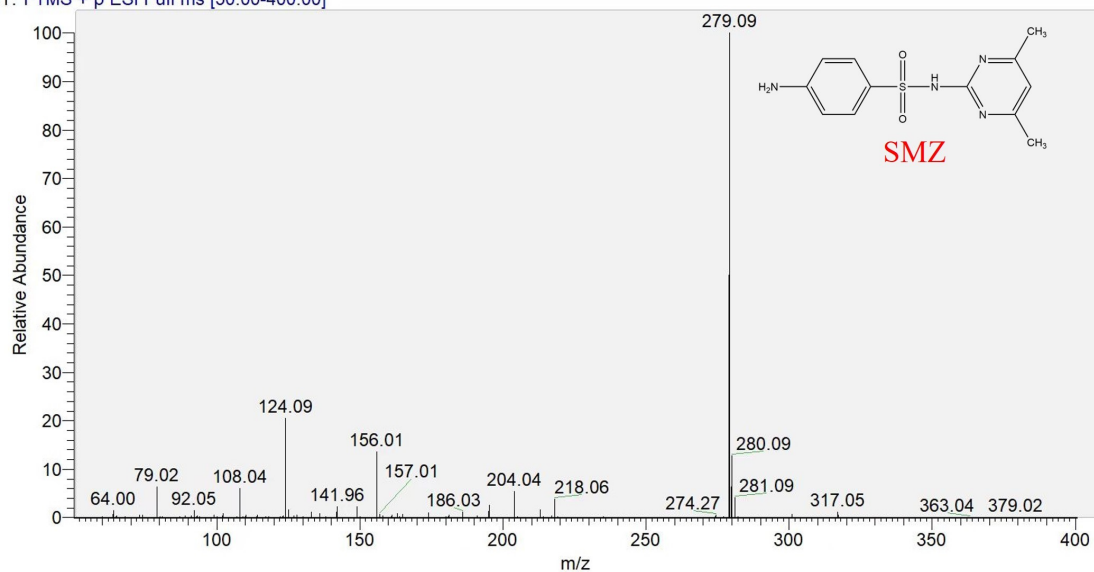

**Fig. S9.** Mass spectrum of intermediates detected during SMZ degradation.

T: FTMS + p ESI Full ms [100.00-400.00]

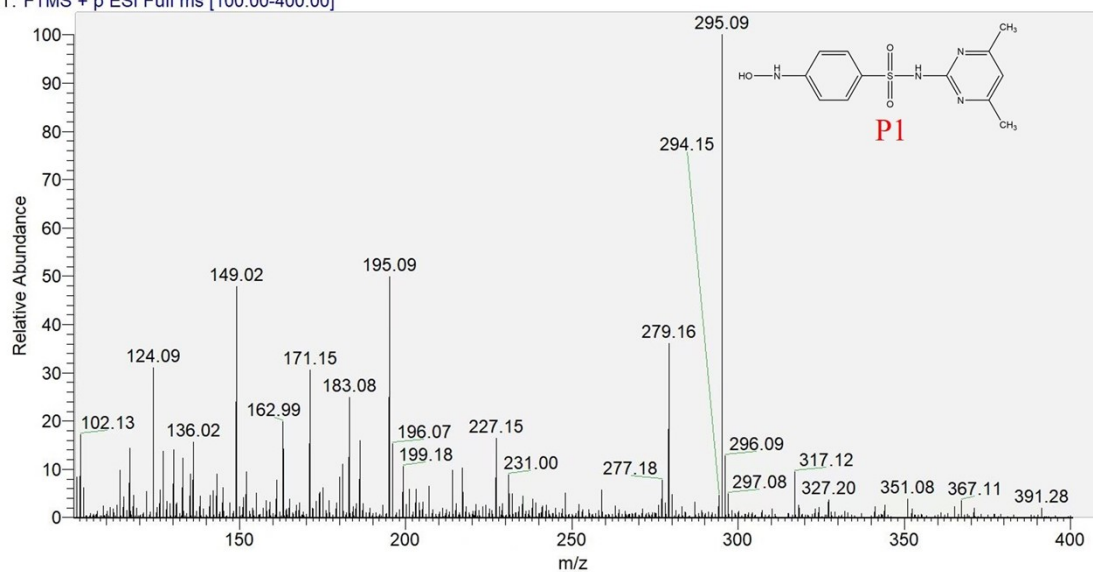

**Fig. S10.** Mass spectrum of intermediate P1 detected during SMZ degradation.

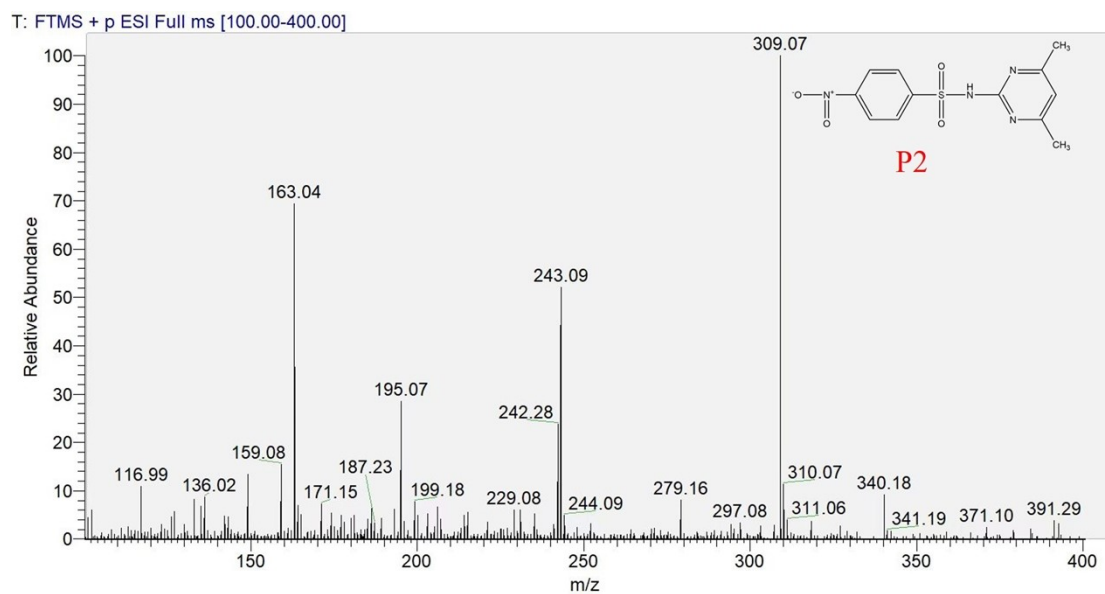

**Fig. S11.** Mass spectrum of intermediate P2 detected during SMZ degradation.

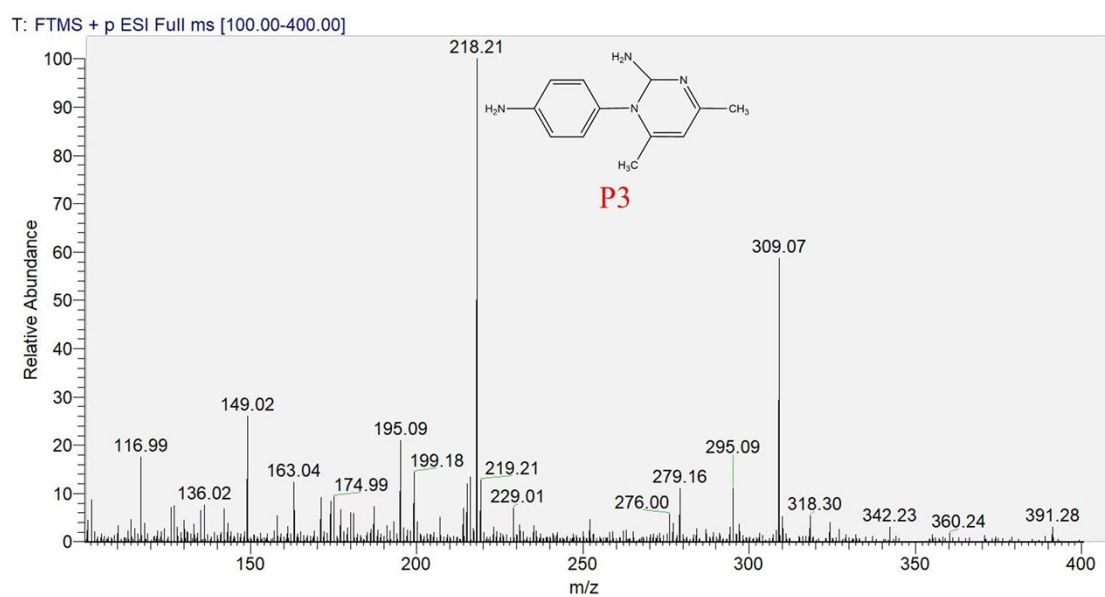

**Fig. S12.** Mass spectrum of intermediate P3 detected during SMZ degradation.

T: FTMS + p ESI Full ms [100.00-400.00]

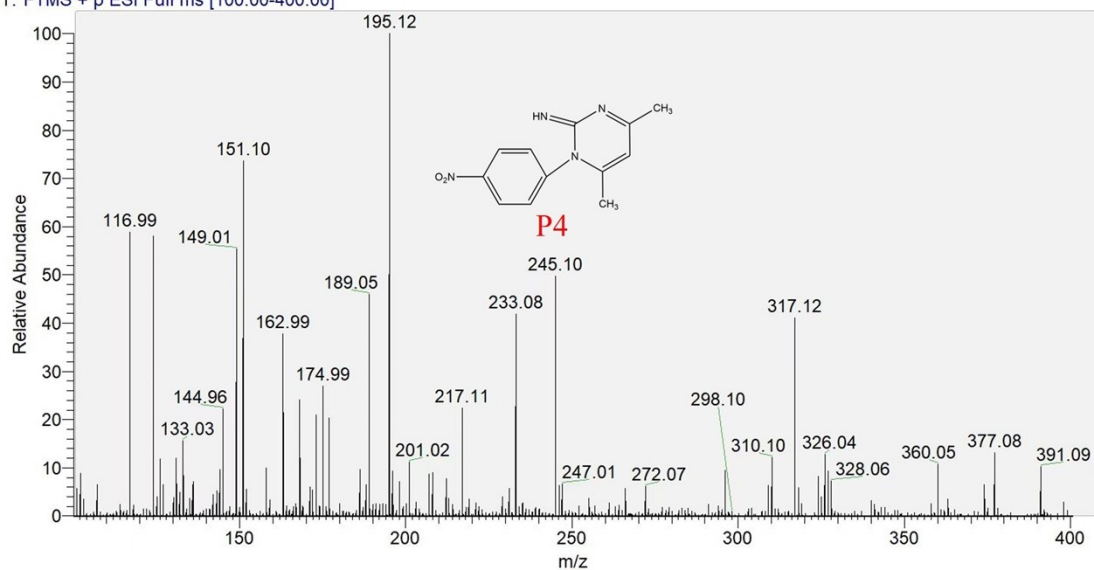

**Fig. S13.** Mass spectrum of intermediate P4 detected during SMZ degradation.

T: FTMS + p ESI Full ms [100.00-400.00]

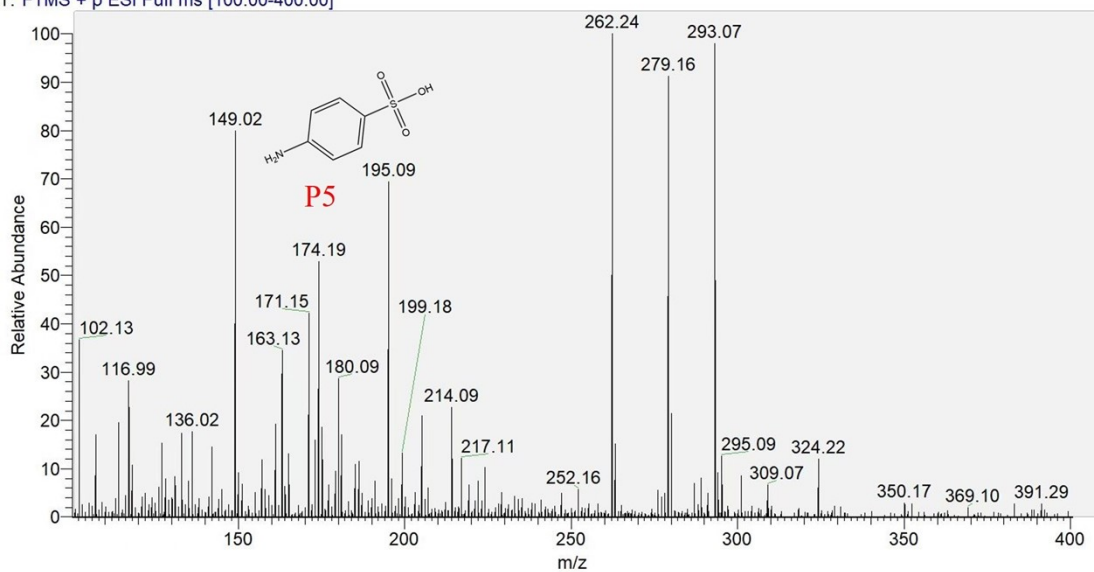

**Fig. S14.** Mass spectrum of intermediate P5 detected during SMZ degradation.

T: FTMS + p ESI Full ms [100.00-400.00]

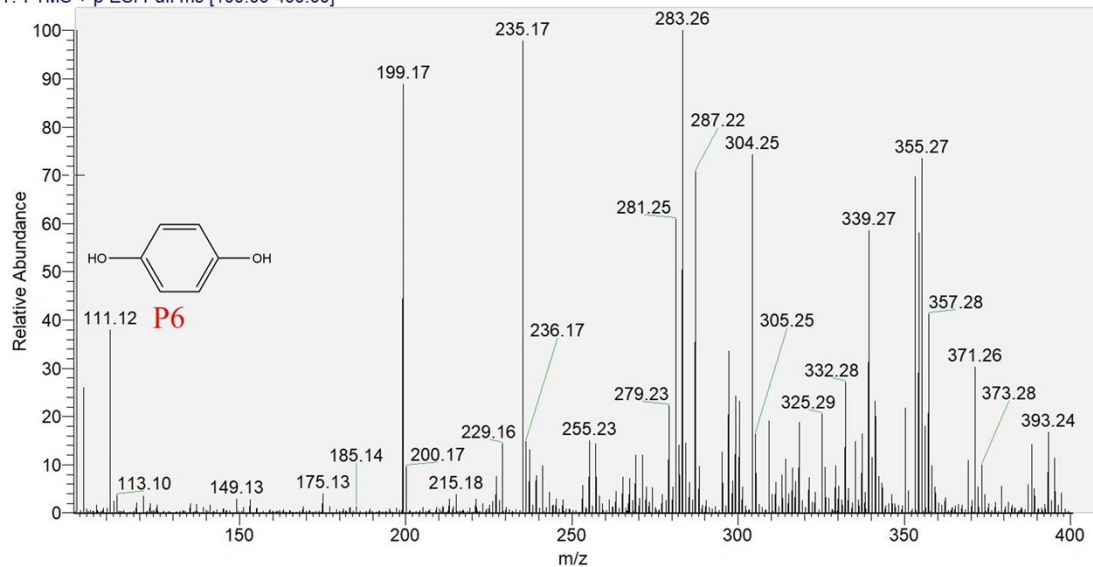

**Fig. S15.** Mass spectrum of intermediate P6 detected during SMZ degradation.

T: FTMS + p ESI Full ms [100.00-400.00]

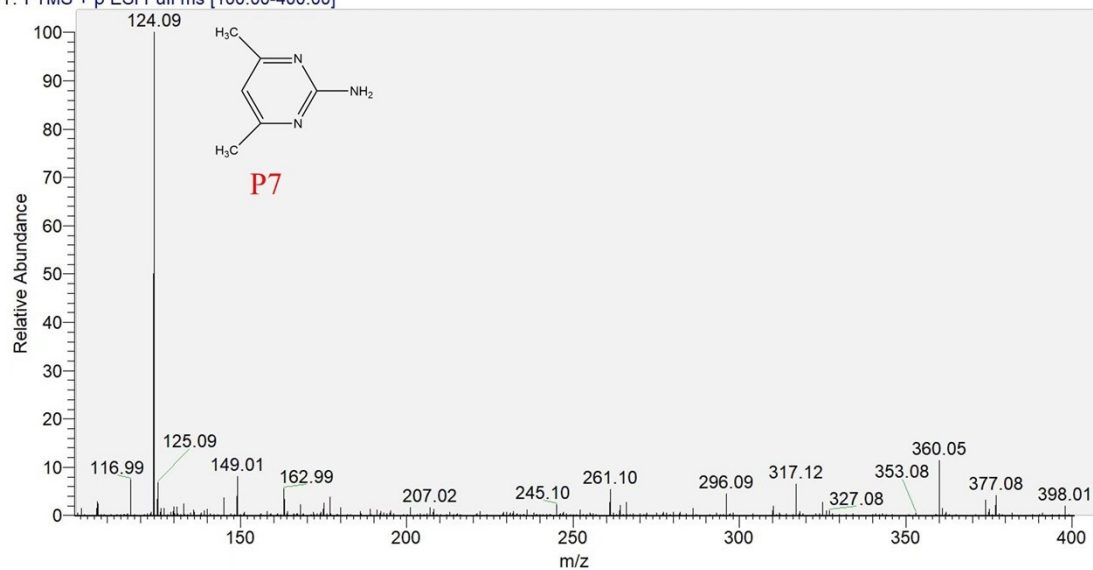

**Fig. S16.** Mass spectrum of intermediate P7 detected during SMZ degradation.

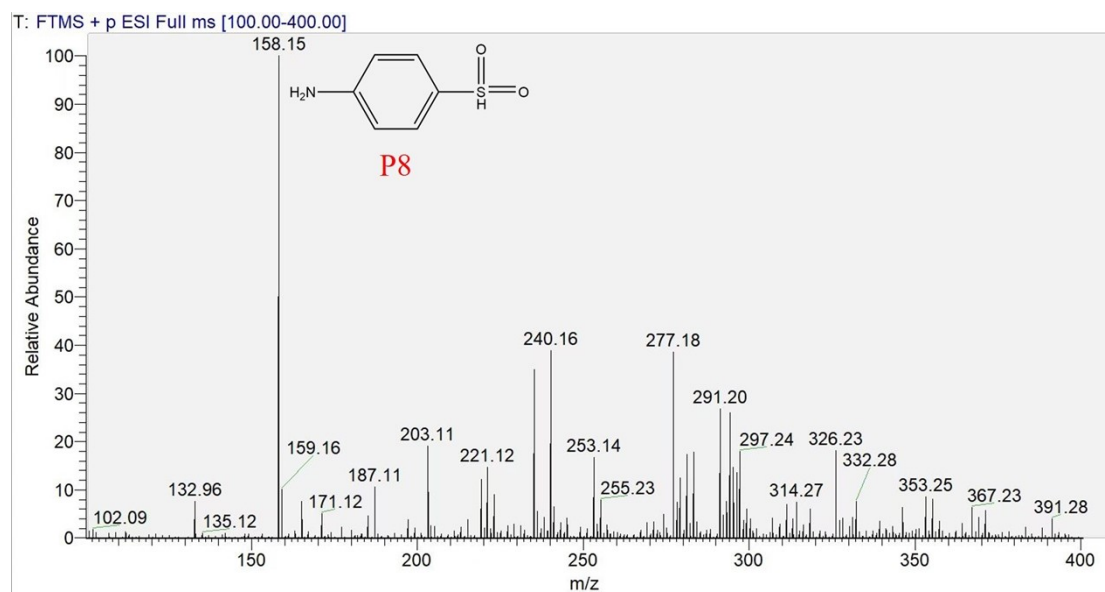

**Fig. S17.** Mass spectrum of intermediate P8 detected during SMZ degradation.

**Table. S1.** List of chemical reagents used in this study.

| Chemical reagents                                                                      | Specifications      | Manufacture                          |
|----------------------------------------------------------------------------------------|---------------------|--------------------------------------|
| Cobalt(II) nitrate hexahydrate<br>$\text{Co}(\text{NO}_3)_2 \cdot 6\text{H}_2\text{O}$ | AR                  | Aladdin Chemical Reagent Co., Ltd    |
| Ammonium fluoride ( $\text{NH}_4\text{F}$ )                                            | 98%                 | Aladdin Chemical Reagent Co., Ltd    |
| Hexamethylenetetramine (HMTA)                                                          | AR                  | Sinopharm Chemical Reagent Co., Ltd. |
| Sodium thiosulfate ( $\text{Na}_2\text{S}_2\text{O}_5$ )                               | AR                  | Aladdin Chemical Reagent Co., Ltd    |
| Sulfamethazine (SMZ)                                                                   | $\geq 99\%$         | Aladdin Chemical Reagent Co., Ltd    |
| Carbamazepine (CBZ)                                                                    | $\geq 98\%$         | Aladdin Chemical Reagent Co., Ltd    |
| Bisphenol F (BPF)                                                                      | $\geq 99\%$         | Macklin Biochemical Co., Ltd.        |
| Tetracycline (TC)                                                                      | $\geq 99\%$         | Aladdin Chemical Reagent Co., Ltd    |
| Ciprofloxacin (CIP)                                                                    | $\geq 99\%$         | Macklin Biochemical Co., Ltd.        |
| Isopropanol (IPA)                                                                      | AR                  | Sinopharm Chemical Reagent Co., Ltd. |
| Furfuryl alcohol (FA)                                                                  | $\geq 97\%$         | Aladdin Chemical Reagent Co., Ltd    |
| Dimethyl sulfoxide (DMSO)                                                              | $\geq 99\%$         | Aladdin Chemical Reagent Co., Ltd    |
| p-Benzoquinone (p-BQ)                                                                  | $\geq 99\%$         | Macklin Biochemical Co., Ltd.        |
| Humic acid (HA)                                                                        | $\geq 90\%$         | Aladdin Chemical Reagent Co., Ltd    |
| 5,5-Dimethyl-1-pyrroline-N-oxide (DMPO)                                                | AR                  | Sigma-Aldrich                        |
| ,2,6,6-Tetramethylpiperidine (TEMP)                                                    | AR                  | Sigma-Aldrich                        |
| Peroxymonosulfate (PMS)                                                                | 4.5% active content | Sinopharm Chemical Reagent Co., Ltd. |



**Table S2.** Specific surface area, total pore volume, and average pore diameter of the samples.

| Sample  | $S_{\text{BET}}$ (m <sup>2</sup> /g) | Pore volume (cm <sup>3</sup> /g) | Average pore size (nm) |
|---------|--------------------------------------|----------------------------------|------------------------|
| CHF-0.5 | 1.2861                               | 0.004458                         | 8.4469                 |
| CHF-1.0 | 1.5997                               | 0.006754                         | 10.6290                |
| CHF-1.5 | 1.2628                               | 0.006083                         | 12.4994                |

**Table S3.** Reported SMZ degradation performances in activated persulfate systems.

| Catalyst<br>(Dosage)                                  | PMS<br>(Concentration) | Pollutant<br>(mg/L) | Removal<br>efficiency | $K_{\text{obs}}$ ( $\text{min}^{-1}$ ) | K-value ( $\text{min}^{-1}\cdot\text{g}^{-1}$ ) | Mechanism                                                   | Ref.             |
|-------------------------------------------------------|------------------------|---------------------|-----------------------|----------------------------------------|-------------------------------------------------|-------------------------------------------------------------|------------------|
| CuCo <sub>2</sub> O <sub>4</sub> spinel<br>(0.01 g/L) | 0.02 (g/L)             | 5                   | 87.2% (20 min)        | 0.107                                  | 10.7                                            | Co <sup>2+</sup> , Cu <sup>2+</sup>                         | [1]              |
| rGO-CNCF<br>(0.2 g/L)                                 | 0.1 (g/L)              | 10                  | 99.9% (30 min)        | 0.292                                  | 1.46                                            | visible light, <sup>1</sup> O <sub>2</sub>                  | [2]              |
| H <sub>2</sub> -reduced hematite<br>(0.2 g/L)         | 0.2 (g/L)              | 10                  | 99.3% (20 min)        | 0.135                                  | 0.675                                           | SO <sub>4</sub> <sup>•−</sup> , •OH                         | [3]              |
| BC-FM <sub>0.25</sub> (0.5 g/L)                       | 0.5 (g/L)              | 50                  | 98% (30 min)          | 0.170                                  | 0.34                                            | electron transfer                                           | [4]              |
| Mn <sub>3</sub> Fe <sub>1</sub> -NC (0.05 g/L)        | 1.5 (mM)               | 5                   | 91.8% (90 min)        | 0.0263                                 | 0.526                                           | electron transfer                                           | [5]              |
| Co@MoS <sub>2</sub> (0.5 g/L)                         | 10 (mM)                | 10                  | 100% (10 min)         | 0.531                                  | 1.062                                           | Co <sup>2+</sup> , <sup>1</sup> O <sub>2</sub>              | [6]              |
| Co@NC (0.05 g/L)                                      | 0.25 (mM)              | 20                  | 100% (20 min)         | 0.334                                  | 6.68                                            | Co(IV), <sup>1</sup> O <sub>2</sub>                         | [7]              |
| Co@MGA (0.3 g/L)                                      | 1 (mM)                 | 20                  | 90% (10 min)          | 0.05815                                | 0.194                                           | electron<br>transfer, <sup>1</sup> O <sub>2</sub>           | [8]              |
| CoOHf (0.2 g/L)                                       | 0.6 (mM)               | 20                  | 100% (10 min)         | 0.999                                  | 4.995                                           | SO <sub>4</sub> <sup>•−</sup> , <sup>1</sup> O <sub>2</sub> | <b>This work</b> |

**Table S4.** Transformation products identified during SMZ degradation by LC–MS analysis.

| Compound | Detected mass (m/z) | Chemical Formula      | Molecular Structure                                                                  |
|----------|---------------------|-----------------------|--------------------------------------------------------------------------------------|
| SMZ      | 279.09              | $C_{12}H_{14}N_4O_2S$ | 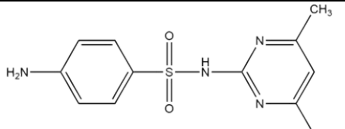   |
| P1       | 295.09              | $C_{12}H_{14}N_4O_3S$ |    |
| P2       | 309.07              | $C_{12}H_{12}N_4O_4S$ |    |
| P3       | 218.21              | $C_{12}H_{16}N_4$     |    |
| P4       | 245.10              | $C_{12}H_{12}N_4O_2$  |   |
| P5       | 174.19              | $C_6H_7NO_3S$         |  |
| P6       | 111.12              | $C_6H_6O_2$           |  |
| P7       | 124.09              | $C_6H_9N_3$           |  |
| P8       | 158.15              | $C_6H_7NO_2S$         |  |

**Table S5.** Predicted ecotoxicity of SMZ and its degradation products evaluated by the T.E.S.T. software.

| Compound | Acute toxicity (mg/L)                    |                                           | Bioconcentration | Developmental toxicity |                            |
|----------|------------------------------------------|-------------------------------------------|------------------|------------------------|----------------------------|
|          |                                          |                                           | factor           |                        |                            |
|          | Daphnia magna<br>LC <sub>50</sub> (48 h) | Fathead minnow<br>LC <sub>50</sub> (96 h) | Predicted value  | Predicted<br>value     | Predicted result           |
| SMZ      | 29.55                                    | 4.74                                      | 2.35             | 0.90                   | Developmental toxicant     |
| P1       | 30.37                                    | 3.31                                      | 3.01             | 0.89                   | Developmental toxicant     |
| P2       | 21.67                                    | 0.82                                      | 5.53             | 0.92                   | Developmental toxicant     |
| P3       | 0.58                                     | 19.64                                     | 12.74            | 0.72                   | Developmental toxicant     |
| P4       | 1.95                                     | 1.60                                      | 34.30            | 1.01                   | Developmental toxicant     |
| P5       | 14.35                                    | 143.01                                    | 2.50             | 0.45                   | Developmental NON-toxicant |
| P6       | 13.51                                    | 43.29                                     | 13.43            | 0.52                   | Developmental toxicant     |
| P7       | 8.21                                     | 404.20                                    | 3.03             | 0.68                   | Developmental toxicant     |
| P8       | 8.44                                     | 81.49                                     | 2.95             | 0.36                   | Developmental NON-toxicant |

white boxes, not harmful: LC<sub>50</sub>(48h) > 10 mg/L, LC<sub>50</sub>(96h) > 100 mg/L; yellow boxes, harmful: 10 mg/L ≥ LC<sub>50</sub>(48h) > 1 mg/L, 100 mg/L ≥ LC<sub>50</sub>(96h) > 10 mg/L; orange boxes, toxic: 1 mg/L ≥ LC<sub>50</sub>(48h) ≥ 0.1 mg/L, 10 mg/L ≥ LC<sub>50</sub>(96h) ≥ 1 mg/L; red boxes, highly toxic: LC<sub>50</sub>(48h) < 0.1 mg/L, LC<sub>50</sub>(96h) < 1 mg/L.
